# Supplementary material for: Resource recovery technologies as microbial risk barriers: towards safe use of excreta in agriculture based on hazard analysis and critical control point
Source: Royal Society of Chemistry journal article supplement (doi:10.1039/d2ew00832g), 2023-01-01
Supplement: d2ew00832g1.pdf [file d2ew00832g1.pdf]

## SUPPORTING INFORMATION

### **Resource recovery technologies as microbial risk barriers: towards safe use of excreta in agriculture based on hazard analysis and critical control point**

Wakana Oishi <sup>a\*</sup>, Björn Vinnerås<sup>b</sup>, Daisuke Sano <sup>a, c</sup>

*<sup>a</sup> Department of Civil and Environmental Engineering, Graduate School of Engineering, Tohoku University, Aoba 6-6-06, Aramaki, Aoba-ku, Sendai, Miyagi 980-8597, Japan; <sup>b</sup> Department of Energy and Technology, Swedish University of Agricultural Sciences, Box 7032, 75007, Uppsala, Sweden; <sup>c</sup> Department of Frontier Sciences for Advanced Environment, Graduate School of Environmental Studies, Tohoku University, Aoba 6-6-06, Aramaki, Aoba-ku, Sendai, Miyagi 980-8597, Japan*

\*Corresponding Author

Wakana Oishi, Ph.D.

Department of Civil and Environmental Engineering, Graduate School of Engineering, Tohoku University

Postal address: Aoba 6-6-06, Aramaki, Aoba-ku, Sendai, Miyagi 980-8579, Japan

E-mail: wakana.oishi.d1@tohoku.ac.jp

Phone: +81-22-795-3584

## R code for estimation of parameters of Hom's model

```
d<-data.frame(t,N)      # t: every sampling time (day), N: concentration of
microorganisms at time t
params0 <- c(1,1,0.1)   # Default values of the estimates ( $k$ ,  $m$ ,  $\sigma^2$ )
# Function for optimization
f1 <- function(p, data) {
  parameters<-c(k=p[1], m=p[2], sigma2=p[3])
  rss<-data[,2]*exp(-p[1]*data[,1]^p[2])+parameters[3]
  n<-length(data)
  sum(-log(data[,2])-(n/2)*log(2*pi*parameters[3])-1/2/parameters[3]*sum((log(rss)-
log(data[,2]))^2)
}
fit0 <- optim(params0, f1, data=d, control=list(fnscale=-1)) # Optimization
fit0$convergence      # Confirm convergence
fit0$par              # Output estimates
```

Figure S1: Temperature, pH, dilution ratio, and ammonia concentration of urine used in the literature we reviewed.

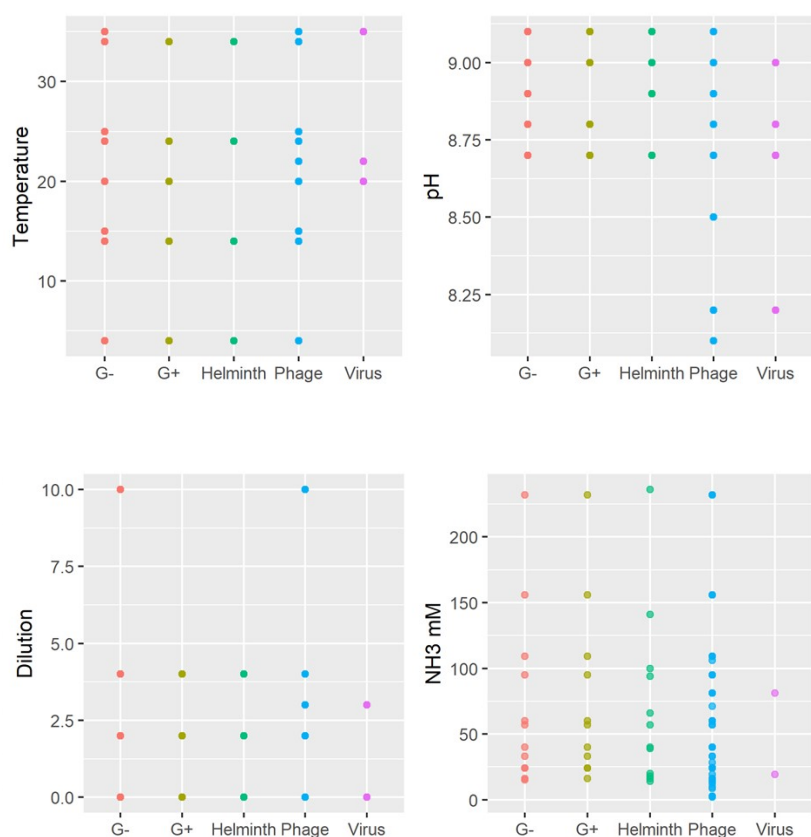

Table S1: Estimated storage time of urine to achieve the target log reduction values of microorganism during thermal storage and storage with the presence of sunlight.

| Microorganisms    | day  | Temperature (°C) | Dilution ratio | Sunlight | References           |
|-------------------|------|------------------|----------------|----------|----------------------|
| <i>Salmonella</i> | 0.15 | 65               | 0              | Yes      | Sangare et al., 2020 |
| <i>Salmonella</i> | 0.25 | 46               | 0              | Yes      | Sangare et al., 2020 |
| <i>E. coli</i>    | 0.09 | 50               | 0              | Yes      | Sangare et al., 2020 |
| <i>E. coli</i>    | 0.09 | 45               | 0              | Yes      | Sangare et al., 2020 |
| <i>E. coli</i>    | 1    | 60               | 1.5            | No       | Zhou et al., 2017    |
| <i>E. coli</i>    | 0.5  | 70               | 1.5            | No       | Zhou et al., 2017    |
| Fecal coliforms   | 0.25 | 60               | 1.5            | No       | Zhou et al., 2017    |
| Fecal coliforms   | 0.25 | 70               | 1.5            | No       | Zhou et al., 2017    |
| <i>Salmonella</i> | 0.2  | 29.1             | 0              | Yes      | Nordin et al., 2013  |
| <i>E. coli</i>    | 0.2  | 29.1             | 0              | Yes      | Nordin et al., 2013  |

|                     |      |      |   |     |                     |
|---------------------|------|------|---|-----|---------------------|
| <i>Enterococcus</i> | 15.4 | 28.1 | 0 | Yes | Nordin et al., 2013 |
| <i>Enterococcus</i> | 3.6  | 29.1 | 0 | Yes | Nordin et al., 2013 |
| <i>Ascaris</i> egg  | 17   | 28.1 | 0 | Yes | Nordin et al., 2013 |
| MS2                 | 41   | 29.1 | 0 | Yes | Nordin et al., 2013 |
| phiX174             | 185  | 29.1 | 0 | Yes | Nordin et al., 2013 |
| 28B                 | 275  | 29.1 | 0 | Yes | Nordin et al., 2013 |

Figure S2: Conditions of fecal sludge (temperature, pH, moisture content, and ammonia concentration) in the literature we reviewed.

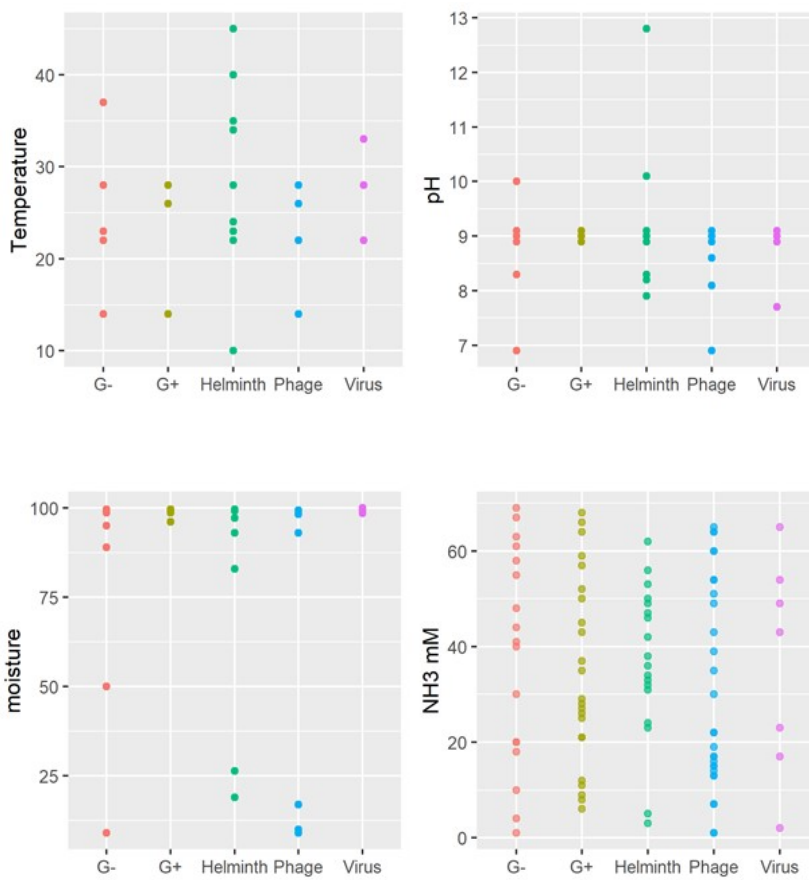



Table S2: Estimated time of fecal sludge to achieve the target log reduction values of *Ascaris* egg and phages.

| Microorganisms     | day | $k$ (day <sup>-1</sup> ) | $m$  | Temperature (°C) | pH  | Moisture (%) | NH <sub>3</sub> (mM) | Desiccant     | References                 |
|--------------------|-----|--------------------------|------|------------------|-----|--------------|----------------------|---------------|----------------------------|
| <i>Ascaris</i> egg | 2   | -                        | -    | 45               | 8.3 | 26.4         | 2.5                  | Dirt          | Cruz Espinoza et al., 2012 |
| <i>Ascaris</i> egg | 42  | -                        | -    | 35               | 8.3 | 26.4         | 1.5                  | Dirt          | Cruz Espinoza et al., 2012 |
| <i>Ascaris</i> egg | 14  | -                        | -    | 40               | 8.3 | 26.4         | 2                    | Dirt          | Cruz Espinoza et al., 2012 |
| <i>Ascaris</i> egg | 5   | 1.7E+00                  | 1.09 | 34               | 13  | 83           | 71                   | Ash           | Nordin et al., 2009        |
| <i>Ascaris</i> egg | 49  | 2.4E-03                  | 2.12 | 34               | 8.2 | 83           | 63                   | -             | Nordin et al., 2009        |
| <i>Ascaris</i> egg | 115 | 3.1E-02                  | 1.2  | 24               | 10  | 83           | 58                   | Ash           | Nordin et al., 2009        |
| <i>Ascaris</i> egg | 63  | 7.4E-01                  | 0.61 | 23               | 9.1 | 97.2         | 340                  | -             | Fidjeland et al., 2013     |
| <i>Ascaris</i> egg | 38  | 5.2E-02                  | 1.43 | 28               | 9.1 | 97.2         | 421                  | -             | Fidjeland et al., 2013     |
| <i>Ascaris</i> egg | 46  | 1.3E-03                  | 2.32 | 23               | 9.1 | 99.2         | 171                  | -             | Fidjeland et al., 2013     |
| <i>Ascaris</i> egg | 42  | 2.7E-01                  | 0.95 | 28               | 9.1 | 99.2         | 213                  | -             | Fidjeland et al., 2013     |
| <i>Ascaris</i> egg | 44  | 1.5E-03                  | 2.3  | 23               | 9.1 | 99.3         | 231                  | -             | Fidjeland et al., 2013     |
| <i>Ascaris</i> egg | 38  | 7.3E-02                  | 1.33 | 28               | 9.1 | 93           | 283                  | -             | Fidjeland et al., 2013     |
| <i>Ascaris</i> egg | 47  | 9.7E-04                  | 2.38 | 28               | 8.9 | 99.5         | 56                   | -             | Fidjeland et al., 2013     |
| <i>Ascaris</i> egg | 93  | 6.6E-03                  | 1.6  | 23               | 9   | 99.6         | 83                   | -             | Fidjeland et al., 2013     |
| <i>Ascaris</i> egg | 51  | 6.3E-02                  | 1.27 | 28               | 9   | 99.6         | 104                  | -             | Fidjeland et al., 2013     |
| <i>Ascaris</i> egg | 188 | 7.8E-04                  | 1.79 | 23               | 8.9 | 99.5         | 44                   | -             | Fidjeland et al., 2013     |
| <i>Ascaris</i> egg | 452 | 4.8E-02                  | 0.86 | 22               | 7.9 | 19           | 2.9                  | Oyster shells | Magri et al., 2013         |
| <i>Ascaris</i> egg | 516 | 5.7E-12                  | 4.5  | 10               | 9.1 | 97.2         | 170                  | -             | Fidjeland et al., 2013     |
| MS2                | 120 | 7.3E-02                  | 1.18 | 26               | 9.1 | 99           | 169                  | -             | Magri et al., 2015         |
| MS2                | 113 | 2.1E-02                  | 1.46 | 26               | 9   | 98.8         | 135                  | -             | Magri et al., 2015         |
| MS2                | 125 | 2.2E-02                  | 1.42 | 26               | 9.1 | 99           | 150                  | -             | Magri et al., 2015         |
| MS2                | 110 | 1.3E-04                  | 2.55 | 26               | 9   | 98.3         | 89                   | -             | Magri et al., 2015         |

|         |     |         |       |    |     |      |     |               |                    |
|---------|-----|---------|-------|----|-----|------|-----|---------------|--------------------|
| MS2     | 183 | 8.0E-03 | 1.51  | 26 | 8.9 | 98.5 | 78  | -             | Magri et al., 2015 |
| MS2     | 547 | 1.2E-01 | 0.82  | 26 | 9   | 98.5 | 69  | -             | Magri et al., 2015 |
| MS2     | 287 | 9.8E-04 | 1.76  | 26 | 8.9 | 99.3 | 36  | -             | Magri et al., 2015 |
| MS2     | 154 | 8.1E-02 | 1.1   | 22 | 8.6 | 10   | 11  | Oyster shells | Magri et al., 2013 |
| MS2     | 319 | 1.3E-01 | 0.884 | 22 | 6.9 | 9    | 0.2 | -             | Magri et al., 2013 |
| PhiX174 | 22  | 1.2E-04 | 3.9   | 28 | 9.1 | 93   | 314 | -             | Magri et al., 2015 |
| PhiX174 | 22  | 9.4E-06 | 4.8   | 28 | 8.9 | 98.8 | 155 | -             | Magri et al., 2015 |
| PhiX174 | 90  | 1.9E-02 | 1.55  | 28 | 9   | 99   | 124 | -             | Magri et al., 2015 |
| PhiX174 | 78  | 1.1E-03 | 2.26  | 28 | 9   | 98.3 | 124 | -             | Magri et al., 2015 |
| PhiX174 | 98  | 9.4E-02 | 1.18  | 28 | 8.9 | 99.3 | 56  | -             | Magri et al., 2015 |
| PhiX174 | 100 | 2.4E-03 | 1.97  | 28 | 9.1 | 99   | 225 | -             | Magri et al., 2015 |
| PhiX174 | 162 | 3.8E-02 | 1.24  | 28 | 9   | 98.5 | 91  | -             | Magri et al., 2015 |
| PhiX174 | 172 | 3.5E-02 | 1.24  | 28 | 9   | 98.5 | 130 | -             | Magri et al., 2015 |
| PhiX174 | 406 | 2.1E-01 | 0.766 | 28 | 8.9 | 98.5 | 78  | -             | Magri et al., 2015 |
| PhiX174 | 180 | 4.1E-02 | 1.2   | 26 | 9.1 | 99   | 169 | -             | Magri et al., 2015 |
| PhiX174 | 191 | 3.8E-02 | 1.2   | 26 | 9   | 93   | 193 | -             | Magri et al., 2015 |
| PhiX174 | 182 | 4.5E-02 | 1.18  | 26 | 9   | 98.8 | 135 | -             | Magri et al., 2015 |
| PhiX174 | 255 | 1.2E-01 | 0.936 | 26 | 9.1 | 99   | 150 | -             | Magri et al., 2015 |
| PhiX174 | 234 | 5.1E-02 | 1.1   | 26 | 9   | 98.3 | 89  | -             | Magri et al., 2015 |
| PhiX174 | 215 | 1.1E-02 | 1.4   | 26 | 9   | 98.5 | 69  | -             | Magri et al., 2015 |
| PhiX174 | 131 | 1.7E-01 | 0.99  | 22 | 8.6 | 10   | 11  | Oyster shells | Magri et al., 2013 |
| PhiX174 | 84  | 1.2E-01 | 1.17  | 22 | 8.1 | 17   | 6   | Oyster shells | Magri et al., 2013 |
| PhiX174 | 158 | 1.7E-02 | 1.4   | 22 | 6.9 | 9    | 0.2 | -             | Magri et al., 2013 |
| PhiX174 | 204 | 4.4E-03 | 1.59  | 14 | 8.9 | 99.3 | 14  | -             | Magri et al., 2015 |

Figure S3: Bucket latrine. A bucket or pan is placed in a chamber below a pedestal or seat with a drop hole. When the bucket is full, it is taken out from the chamber through the rear flap and emptied.

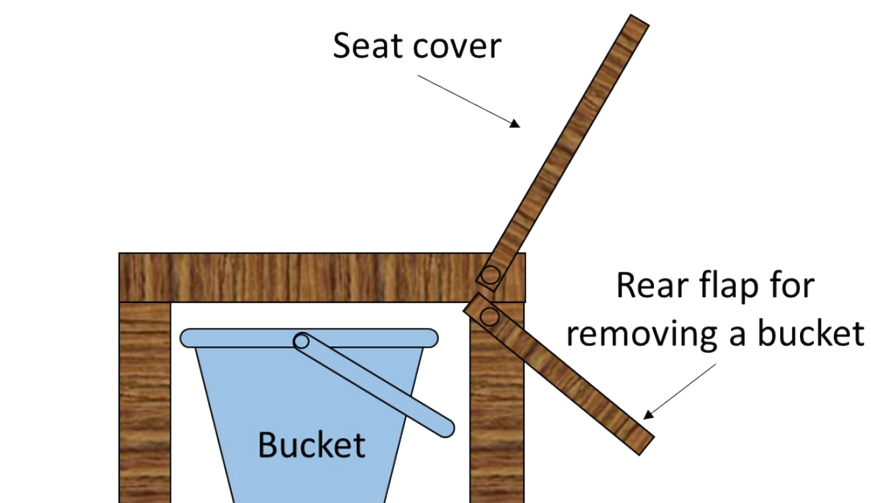

Figure S4: Single ventilated improved latrine (modified from Tilley et al. (2014)). Excreta, along with anal cleaning materials, are deposited into a pit. Typically, a pit is at least 3 m in depth and 1 m in diameter.

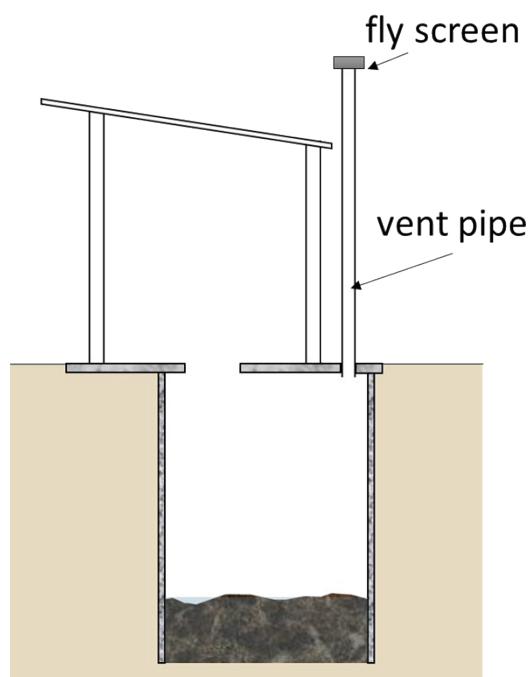



Figure S5: Septic tank (modified from Tilley et al. (2014)). A septic tank is a watertight chamber made of concrete, fibreglass, polyvinyl chloride, or plastic. The accumulated sludge and scum need to be periodically removed.

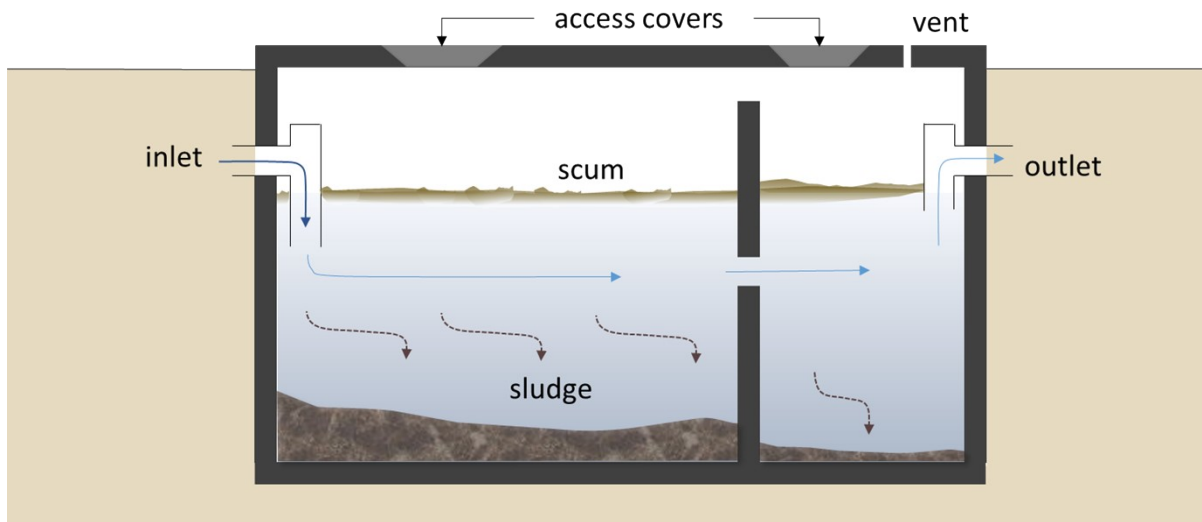

Figure S6: Twin pits and pour flush toilet (modified from Tilley et al. (2014)). Blackwater is collected in a leach pit and allowed to slowly infiltrate into the surrounding soil.

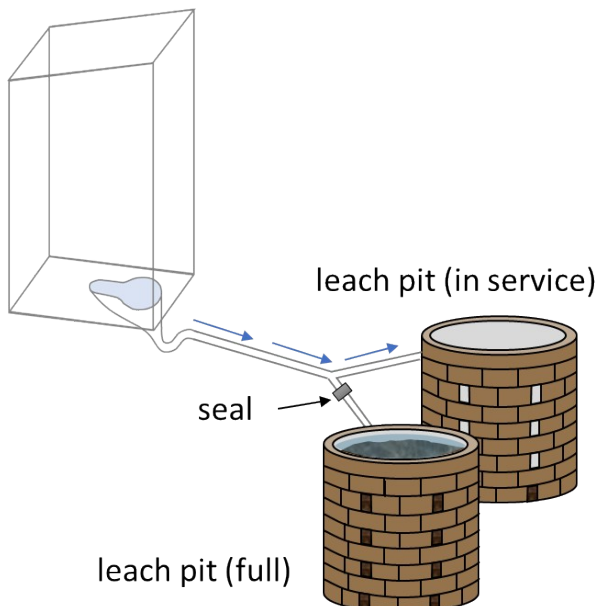

Figure S7: Double alternating dry pit (modified from Tilley et al. (2014)). One pit is used while the contents of another pit are partially sanitized for at least 1 to 2 years after several years of filling.

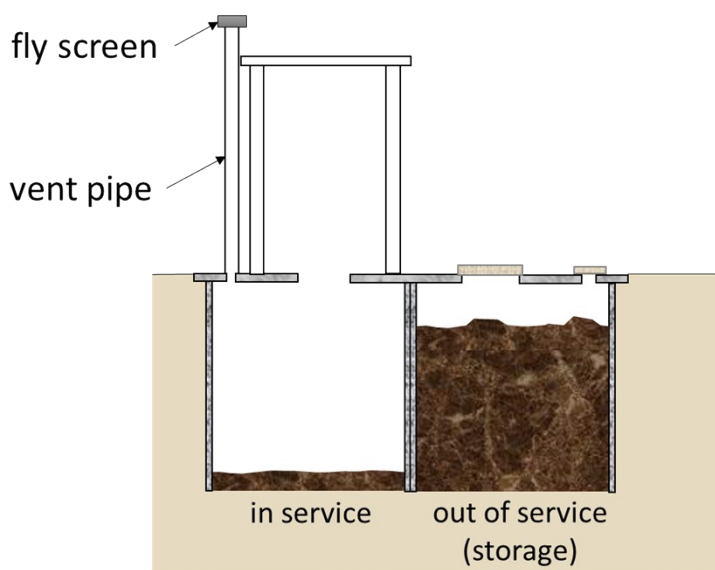

Figure S8: Double dehydration vaults (modified from Tilley et al. (2014)). Dehydration vaults are used to collect, store, and dry feces, whereas urine is separately collected in a urine tank.

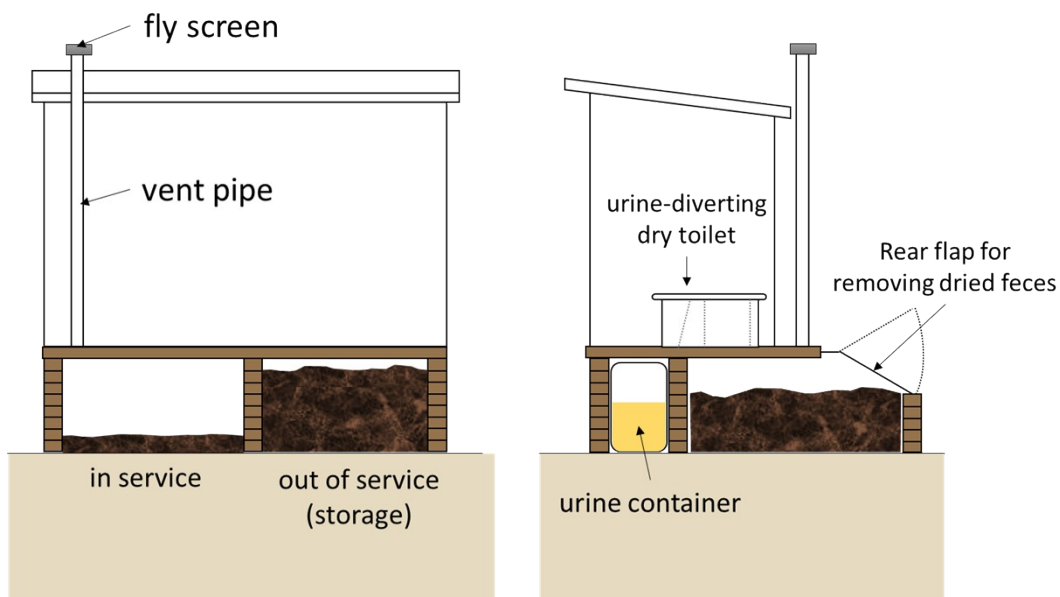

Table S3: Estimated storage time of fecal sludge to achieve the target log reduction values of microorganisms by lime addition.

| Microorganisms      | day   | $k$ (day <sup>-1</sup> ) | $m$   | Temperature (°C) | pH   | Moisture (%) | NH <sub>3</sub> (mM) | Lime (wt%) | References            |
|---------------------|-------|--------------------------|-------|------------------|------|--------------|----------------------|------------|-----------------------|
| <i>E. coli</i>      | 1     | 1.4E+01                  | 0.233 | 23               | 12.7 | 89           | 328                  | na         | Ogunyoku et al., 2016 |
| <i>E. coli</i>      | 0.2   | 1.3E-01                  | 0.948 | 37               | 10   | 50           | na                   | na         | Hijikata et al., 2016 |
| <i>E. coli</i>      | 0.1   | 2.6E-01                  | 0.816 | 37               | 10.5 | 50           | na                   | na         | Hijikata et al., 2016 |
| <i>E. coli</i>      | 0.2   | 3.3E-01                  | 0.394 | 37               | 11   | 50           | na                   | na         | Hijikata et al., 2016 |
| <i>E. coli</i>      | 0.6   | 2.0E+01                  | 0.7   | 27               | 10.5 | 90           | na                   | 14%        | Greya et al., 2016    |
| <i>E. coli</i>      | 0.01  | 2.0E-02                  | 1     | 27               | 11   | 90           | na                   | 16%        | Greya et al., 2016    |
| Fecal coliforms     | 0.021 | -                        | -     | 21               | 12.9 | 94           | na                   | 10%        | da Silva et al., 2018 |
| Fecal coliforms     | 0.021 | -                        | -     | 21               | 12.9 | 94           | na                   | 20%        | da Silva et al., 2018 |
| Fecal coliforms     | 0.021 | -                        | -     | 21               | 12.9 | 94           | na                   | 30%        | da Silva et al., 2018 |
| <i>Enterococcus</i> | 1     | 4.2E-01                  | 0.153 | 37               | 8.1  | 60           | 0                    | 1%         | Darimani et al., 2015 |
| <i>Ascaris</i> eggs | 20    | 1.21E-05                 | 2.2   | 23               | 12.8 | 89           | 464                  | na         | Ogunyoku et al., 2016 |
| MS2                 | 2.3   | 1.2E+01                  | 0.64  | 37               | 10   | 50           | na                   | na         | Hijikata et al., 2016 |
| MS2                 | 0.3   | 6.1E+01                  | 0.86  | 37               | 10.5 | 50           | na                   | na         | Hijikata et al., 2016 |
| MS2                 | 0.2   | 8.8E+01                  | 0.85  | 37               | 11   | 50           | na                   | na         | Hijikata et al., 2016 |
| MS2                 | 0.3   | 2.2E-01                  | 0.69  | 23               | 12.5 | 89           | 36                   | na         | Ogunyoku et al., 2016 |
| MS2                 | 26    | 3.7E-01                  | 0.13  | 23               | 12.7 | 89           | 328                  | na         | Ogunyoku et al., 2016 |
| <i>E. coli</i>      | 51    | 6.3E+00                  | 0.2   | 27               | 10   | 90           | na                   | 11%        | Greya et al., 2016    |
| <i>Ascaris</i> egg  | 7122  | 2.65E-01                 | 0.1   | 23               | 12.8 | 89           | 50                   | na         | Ogunyoku et al., 2016 |

Table S4: Estimated storage time of fecal sludge to achieve the target log reduction values of microorganisms by solar drying and pasteurization.

| Microorganisms      | day  | $k$ (day <sup>-1</sup> ) | $m$  | Temperature (°C) | pH  | Moisture (%) | Sunlight | References            |
|---------------------|------|--------------------------|------|------------------|-----|--------------|----------|-----------------------|
| <i>E. coli</i>      | 0.45 | 1.1E-01                  | 0.7  | 75               | 7.4 | 10           | Yes      | Sossou et al., 2016   |
| <i>Enterococcus</i> | 0.65 | 6.9E-01                  | 1.06 | 75               | 7.4 | 10           | Yes      | Sossou et al., 2016   |
| <i>E. coli</i>      | 0.4  | 3.2E-02                  | 0.78 | 50               | na  | 50           | No       | Darimani et al., 2015 |
| <i>E. coli</i>      | 0.0  | 6.25E-01                 | 0.14 | 70               | na  | 50           | No       | Darimani et al., 2015 |
| <i>Enterococcus</i> | 1.3  | 3.9E-02                  | 0.8  | 50               | na  | 50           | No       | Darimani et al., 2015 |
| <i>Enterococcus</i> | 0.2  | 2.8E-01                  | 0.6  | 70               | na  | 50           | No       | Darimani et al., 2015 |
| <i>Ascaris</i> egg  | 0.4  | 4.0E-01                  | 2.44 | 75               | 7.4 | 10           | Yes      | Sossou et al., 2016   |
| <i>Ascaris</i> egg  | 0.3  | 8.8E-02                  | 1    | 50               | na  | 50           | No       | Darimani et al., 2016 |
| <i>Ascaris</i> egg  | 0.2  | 1.6E-01                  | 2.34 | 60               | na  | 50           | No       | Darimani et al., 2016 |
| MS2                 | 0.9  | -                        | -    | 50               | na  | 70           | No       | Darimani et al., 2018 |
| MS2                 | 1.2  | -                        | -    | 50               | na  | 60           | No       | Darimani et al., 2018 |
| MS2                 | 3.8  | -                        | -    | 50               | na  | 50           | No       | Darimani et al., 2018 |
| MS2                 | 1.5  | -                        | -    | 40               | na  | 70           | No       | Darimani et al., 2018 |
| MS2                 | 2.3  | -                        | -    | 40               | na  | 60           | No       | Darimani et al., 2018 |
| MS2                 | 4.3  | -                        | -    | 40               | na  | 50           | No       | Darimani et al., 2018 |
| <i>Ascaris</i> egg  | 220  | -                        | -    | 31               | 6.7 | 19           | Yes      | Dey et al., 2016      |
| <i>E. coli</i>      | 267  | 4.3E-05                  | 2.27 | 31               | 6.7 | 19           | Yes      | Dey et al., 2016      |

Table S5: Estimated storage time of fecal sludge to achieve the target log reduction values of microorganisms by anaerobic digestion.

| Microorganisms      | day  | $k$ (day <sup>-1</sup> ) | $m$  | Temperature (°C) | References              |
|---------------------|------|--------------------------|------|------------------|-------------------------|
| <i>Ascaris</i> egg  | 66   | -                        | -    | 37               | Kato et al., 2003       |
| <i>Ascaris</i> egg  | 6    | -                        | -    | 47               | Kato et al., 2003       |
| <i>Ascaris</i> egg  | 0.6  | 2.20E-01                 | 1.44 | 54               | Seruga et al., 2020     |
| <i>Ascaris</i> egg  | 0.8  | 2.80E-01                 | 1.19 | 54               | Seruga et al., 2020     |
| <i>Ascaris</i> egg  | 22.4 | 2.20E-02                 | 1.95 | 40               | Harroff et al., 2019    |
| <i>Ascaris</i> egg  | 28   | 1.55E-03                 | 2.61 | 39               | Harroff et al., 2019    |
| <i>Ascaris</i> egg  | 53   | 5.00E-04                 | 2.48 | 37               | Harroff et al., 2019    |
| <i>E. coli</i>      | 462  | -                        | -    | 28               | Kearney et al., 1993    |
| <i>E. coli</i>      | 51   | -                        | -    | 25               | Pandey and Soupir, 2011 |
| <i>E. coli</i>      | 45   | -                        | -    | 37               | Pandey and Soupir, 2011 |
| <i>E. coli</i>      | 3    | -                        | -    | 52.5             | Pandey and Soupir, 2011 |
| <i>Salmonella</i>   | 210  | -                        | -    | 28               | Kearney et al., 1993    |
| <i>Salmonella</i>   | 0.5  | 7.30E+00                 | 0.25 | 54               | Seruga et al., 2020     |
| <i>Salmonella</i>   | 0.3  | 8.90E+00                 | 0.21 | 54               | Seruga et al., 2020     |
| <i>Enterococcus</i> | 0.5  | 7.20E+00                 | 0.26 | 54               | Seruga et al., 2020     |
| <i>Enterococcus</i> | 0.5  | 6.90E+00                 | 0.27 | 54               | Seruga et al., 2020     |
| MS2                 | 10   | 1.40E-01                 | 2    | 35               | Decrey and Kohn, 2017   |
| MS2                 | 4    | 4.00E+00                 | 1    | 35               | Decrey and Kohn, 2017   |
| MS2                 | 2    | 1.04E+01                 | 0.4  | 35               | Decrey and Kohn, 2017   |
| MS2                 | 2    | 6.20E+00                 | 2.3  | 35               | Decrey and Kohn, 2017   |
| phiX174             | 214  | 1.90E+00                 | 0.37 | 35               | Decrey and Kohn, 2017   |
| B40-8               | 414  | 9.60E-01                 | 0.51 | 37               | Baert et al., 2010      |
| B40-8               | 466  | 1.67E+00                 | 0.41 | 37               | Baert et al., 2010      |
| B40-8               | 83   | 2.00E+00                 | 0.53 | 52               | Baert et al., 2010      |
| B40-8               | 10   | -                        | -    | 52               | Baert et al., 2010      |
| Human adenovirus    | 19   | 1.34E+00                 | 0.8  | 35               | Decrey and Kohn, 2017   |
| Human adenovirus    | 36   | 4.50E-02                 | 1.6  | 35               | Decrey and Kohn, 2017   |
| Murine norovirus 1  | 38   | 1.63E+00                 | 0.7  | 37               | Baert et al., 2010      |
| Murine norovirus 1  | 68.2 | 3.10E+00                 | 0.45 | 37               | Baert et al., 2010      |
| Murine norovirus 1  | 21.4 | 3.20E+00                 | 0.61 | 52               | Baert et al., 2010      |
| Murine norovirus 1  | 19.5 | 3.70E+00                 | 0.58 | 52               | Baert et al., 2010      |

## References

1. Sangare D, Brou AL, Sou/dakoure M, Tagro P V. Urine treatment by solar disinfection for agriculture reuse purpose in a poor rural context: case of Burkina Faso. *J Water, Sanit Hyg Dev.* 2020;1–9.
2. Zhou X, Li Y, Li Z, Xi Y, Uddin SMN, Zhang Y. Investigation on microbial inactivation and urea decomposition in human urine during thermal storage. *J Water Sanit Hyg Dev.* 2017;7(3):378–86.
3. Nordin A, Niwagaba C, Jönsson H, Vinnerås B. Pathogen and indicator inactivation in source-separated human urine heated by the sun. *J Water Sanit Hyg Dev.* 2013;3(2):181–8.
4. Cruz Espinoza LM, Yeh D, Vinnerås B, Rajaram L, Corvin J, Izurieta R. Inactivation of ascaris suum by ammonia in feces simulating the parameters of the solar toilet. *J Appl Sci Environ Sanit* [Internet]. 2012;7(3):173–82. Available from: <http://libproxy.lib.unc.edu/login?url=http://search.proquest.com/docview/912918996?accountid=14244>
5. Nordin A, Nyberg K, Vinnerås B. Inactivation of ascaris eggs in source-separated urine and feces by ammonia at ambient temperatures. *Appl Environ Microbiol.* 2009;75(3):662–7.
6. Fidjeland J, Magri ME, Jönsson H, Albiñ A, Vinnerås B. The potential for self-sanitisation of faecal sludge by intrinsic ammonia. *Water Res.* 2013;47(16):6014–23.
7. Magri ME, Philippi LS, Vinnerås B. Inactivation of pathogens in feces by desiccation and urea treatment for application in urine-diverting dry toilets. *Appl Environ Microbiol.* 2013;79(7):2156–63.
8. Magri ME, Fidjeland J, Jönsson H, Albiñ A, Vinnerås B. Inactivation of adenovirus, reovirus and bacteriophages in fecal sludge by pH and ammonia. *Sci Total Environ* [Internet]. 2015;520:213–21. Available from: <http://dx.doi.org/10.1016/j.scitotenv.2015.03.035>
9. Tilley E, Ulrich L, Luethi C, Reymond P, Zurburegg C, Lüthi C, et al. Compendium of sanitation systems and technologies. Development. 2014;
10. Ogunyoku TA, Habebo F, Nelson KL. In-toilet disinfection of fresh fecal sludge with ammonia naturally present in excreta. *J Water Sanit Hyg Dev.* 2016;6(1):104–14.
11. Hijikata N, Tezuka R, Kazama S, Otaki M, Ushijima K, Ito R, et al. Bactericidal and virucidal mechanisms in the alkaline disinfection of compost using calcium lime and ash. *J Environ Manage* [Internet]. 2016;181:721–7. Available from: <http://dx.doi.org/10.1016/j.jenvman.2016.08.026>

12. Greya W, Thole B, Anderson C, Kamwani F, Spit J, Mamani G. Off-site lime stabilisation as an option to treat pit latrine faecal sludge for emergency and existing on-site sanitation systems. *J Waste Manag.* 2016;2016:1–8.
13. da Silva DTG, Dias E, Ebdon J, Taylor H. Assessment of recommended approaches for containment and safe handling of human excreta in emergency settings. *PLoS One.* 2018;13(7):1–20.
14. Darimani HS, Ito R, Sossou SK, Funamizu N, Amadou MH. Effect of post-treatment conditions on the inactivation rate of pathogenic bacteria after the composting process. *Compost Sci Util.* 2015;23(3):164–73.
15. Sossou SK, Sou/Dakouré M, Hijikata N, Maiga AH, Funamizu N. Inactivation kinetics of indicator microorganisms during solar heat treatment for sanitizing compost from composting toilet. *J Water Environ Technol.* 2016;14(2):37–46.
16. Darimani HS, Ito R, Maiga, Ynoussa, Sou M, Funamizu N, Maiga AH. Effect of post-treatment conditions on the inactivation of helminth eggs (*Ascaris suum*) after the composting process. *Environ Technol.* 2016;37:920–928.
17. Darimani HS, Ito R, Funamizu N, Maiga AH. Effect of post-treatment conditions on the inactivation of MS2 bacteriophage as indicator for pathogenic viruses after the composting process. *J Agric Chem Environ.* 2018;07(02):73–80.
18. Dey D, Ridwanul ATMH, Kabir B, Ubaid SF. Fecal indicator and *Ascaris* removal from double pit latrine content. *J Water Health.* 2016;14(6):972–9.
19. Kato S, Fogarty E, Bowman D. Effect of aerobic and anaerobic digestion on the viability of *Cryptosporidium parvum* oocysts and *Ascaris suum* eggs. *Int J Environ Health Res.* 2003;13(2):169–79.
20. Seruga P, Krzywonos M, Paluszak Z, Urbanowska A, Pawlak-Kruczek H, Niedźwiecki Ł, et al. Pathogen reduction potential in anaerobic digestion of organic fraction of municipal solid waste and food waste. *Molecules.* 2020;25(2):1–13.
21. Harroff LA, Liotta JL, Bowman DD, Angenent LT. Current time-temperature relationships for thermal inactivation of *Ascaris* eggs at mesophilic temperatures are too conservative and may hamper development of simple, but effective sanitation. *Water Res X* [Internet]. 2019;5:100036. Available from: <https://doi.org/10.1016/j.wroa.2019.100036>
22. Kearney TE, Larkin MJ, Levett PN. The effect of slurry storage and anaerobic digestion on survival of pathogenic bacteria. *J Appl Bacteriol.* 1993;74:86–93.
23. Pandey PK, Soupir ML. *Escherichia coli* inactivation kinetics in anaerobic digestion of dairy

manure under moderate, mesophilic and thermophilic temperatures. *AMB Express*. 2011;1(1):1–10.

24. Decrey L, Kohn T. Virus inactivation in stored human urine, sludge and animal manure under typical conditions of storage or mesophilic anaerobic digestion. *Environ Sci Water Res Technol*. 2017;3(3):492–501.
25. Baert L, De Gusseme B, Boon N, Verstraete W, Debevere J, Uyttendaele M. Inactivation of murine norovirus 1 and *Bacteroides fragilis* phage B40-8 by mesophilic and thermophilic anaerobic digestion of pig slurry. *Appl Environ Microbiol*. 2010;76(6):2013–7.
